# Supplementary material
Source: PubMed Central journal article supplement (PMC3370597)
Supplement: supp_80.6.2061_IAI-IAI00148-12-s01.pdf [file supp_80.6.2061_IAI-IAI00148-12-s01.pdf]

## Supplemental Figure 1. Protein production by mutant strains

**A.** Schematic depicting the *cyaA* and *fhaB* genetic loci for strains used in this study. **B.** Bacterial cultures were normalized based on optical density, whole cell lysates and culture supernatants were collected for SDS-PAGE protein separation and Western blot. Production of FHA (green) and ACT (red) were detected using a Licor Odyssey imager.

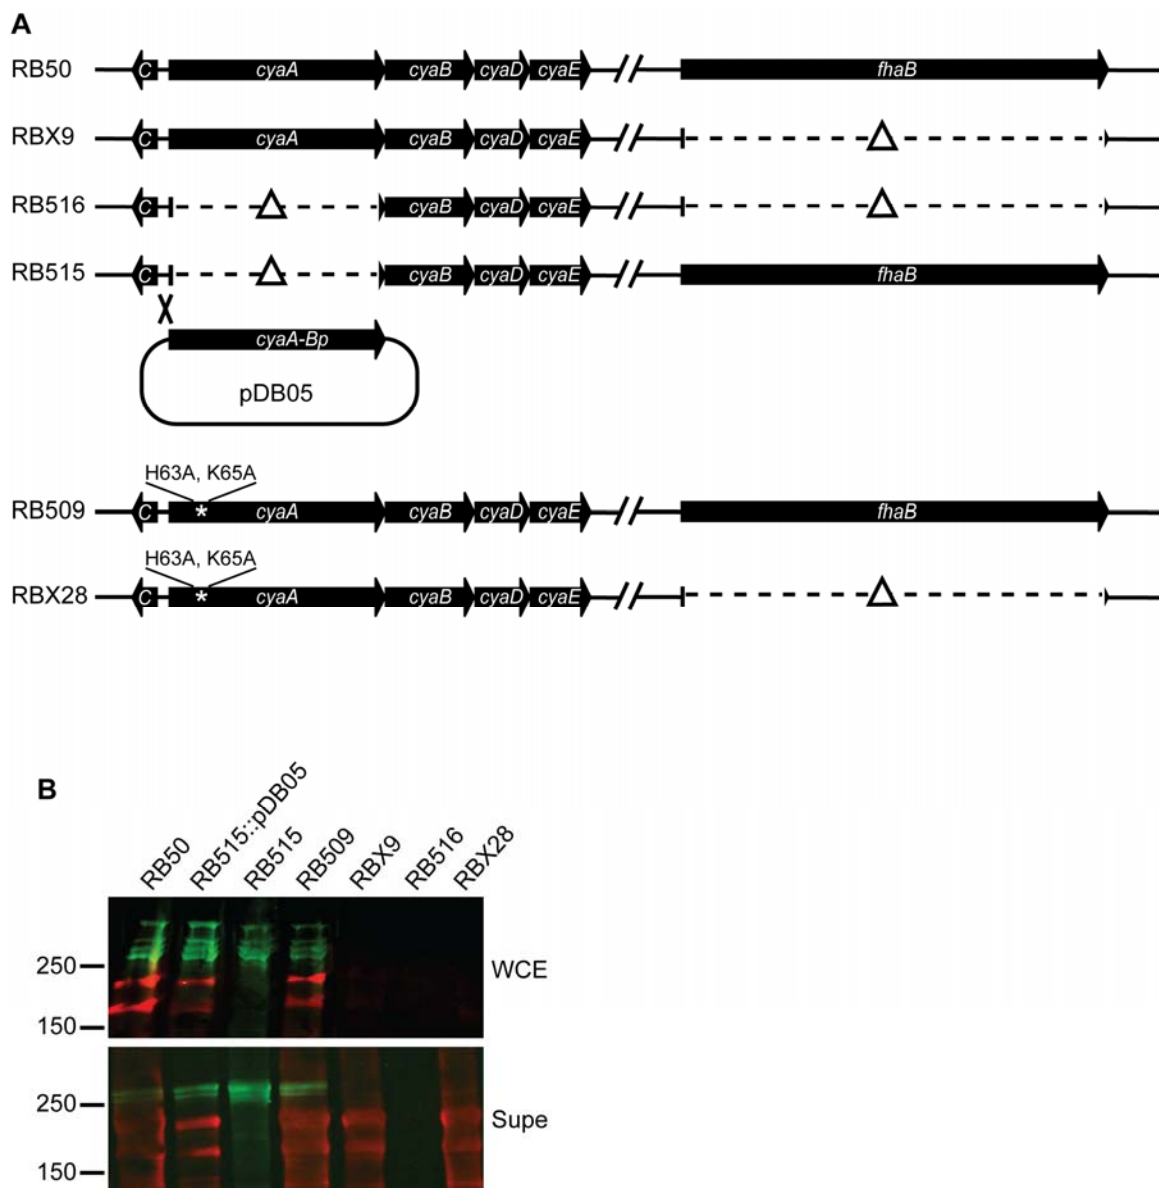

## Supplemental Figure 2. Cytokine production in lung homogenates normalized to the number of cfu

Lung homogenates assayed via Luminex technology for cytokine production (Fig. 3C) were further analyzed and normalized to a value per cfu of bacteria isolated at the given time point. Statistics are calculated as significant variation from wild type ( $*=P < 0.05$ ,  $**=P < 0.001$ ,  $***=P < 0.0001$ ).

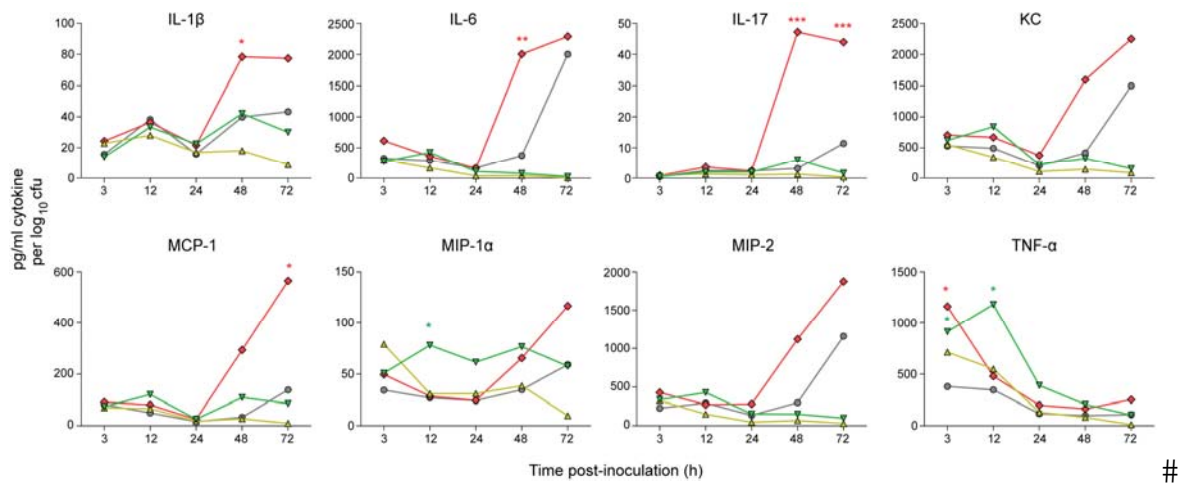

**Supplemental Table 1. Strains and plasmids used in this study**

| Name                      | Description                                                                                                                                        | Reference/Source      |
|---------------------------|----------------------------------------------------------------------------------------------------------------------------------------------------|-----------------------|
| <i>Bordetella</i> strains |                                                                                                                                                    |                       |
| RB50                      | Wild-type <i>B. bronchiseptica</i>                                                                                                                 | (1)                   |
| RB515::pDB05              | RB50 expressing CyaA <sub>Bp</sub> instead of CyaA <sub>Bb</sub>                                                                                   | This study            |
| RB515                     | RB50Δ <i>cyaA</i> strain, contains only the first 4 and last 5 codons of <i>cyaA</i>                                                               | This study            |
| RB509                     | RB50 expressing catalytically inactive CyaA                                                                                                        | This study            |
| RBX9                      | RB50Δ <i>fhaB</i> strain, contains only the first 4 and last 5 codons of <i>fhaB</i>                                                               | (2)                   |
| RB516                     | RB50Δ <i>fhaB</i> Δ <i>cyaA</i> strain                                                                                                             | This study            |
| RBX28                     | RB50Δ <i>fhaB</i> strain expressing catalytically inactive CyaA                                                                                    | This study            |
| RBX11Δ28                  | RB50Δ <i>fhaS</i> strain containing a 28 a.a deletion within the mature C-terminal domain of <i>fhaB</i>                                           | (3)                   |
| BPSM                      | Str <sup>r</sup> derivative of clinical <i>B. pertussis</i> isolate Tohama I                                                                       | (4)                   |
| <i>E. coli</i> strains    |                                                                                                                                                    |                       |
| DH5α                      | Molecular cloning strain                                                                                                                           | BRL; Gaithersburg, MD |
| RH03                      | Conjugation strain (diaminopimelic acid auxotroph)                                                                                                 | (5)                   |
| Plasmids                  |                                                                                                                                                    |                       |
| pEG7                      | <i>Bordetella</i> suicide plasmid (Gent <sup>r</sup> Amp <sup>r</sup> )                                                                            | (6)                   |
| pDB05                     | pEG7 containing <i>cyaA</i> from <i>B. pertussis</i> strain BPSM                                                                                   | This study            |
| pEG7S                     | Allelic exchange plasmid (Gent <sup>r</sup> Amp <sup>r</sup> Sucrose <sup>s</sup> )                                                                | (7)                   |
| pCI56                     | pEG7S containing a large in-frame deletion of <i>cyaA</i> <sub>Bb</sub> , used to generate strains RB515 and RB516                                 | This study            |
| pCI54                     | pEG7S encoding catalytically inactive CyaA ( <i>cyaA</i> <sub>Bb</sub> has mutated codons H63A and K65A), used to generate strains RB509 and RBX28 | This study            |
| pΔ <i>fhaB</i>            | pEG7S containing a large in-frame deletion of <i>fhaB</i> <sub>Bb</sub> , used to generate strains RBX9 and RB516                                  | (7)                   |
|                           |                                                                                                                                                    |                       |

1. Cotter PA, Miller JF (1994) BvgAS-mediated signal transduction: analysis of phase-locked regulatory mutants of *Bordetella bronchiseptica* in a rabbit model. *Infect Immun* 62: 3381-3390.

2. Cotter PA, Yuk MH, Mattoo S, Akerley BJ, Boschwitz J, et al. (1998) Filamentous hemagglutinin of *Bordetella bronchiseptica* is required for efficient establishment of tracheal colonization. *Infect Immun* 66: 5921-5929.

3. Julio SM, Inatsuka CS, Mazar J, Dieterich C, Relman DA, Cotter PA. (2009) Natural-host animal models indicate functional interchangeability between the filamentous hemagglutinins of *Bordetella pertussis* and *Bordetella bronchiseptica* and reveal a role for the mature C-terminal domain, but not the RGD motif, during infection. *Mol. Microbiol* 71: 1574-1590.
4. Menozzi, F. D., P. E. Boucher, G. Riveau, C. Gantiez, and C. Locht. 1994. Surface-associated filamentous hemagglutinin induces autoagglutination of *Bordetella pertussis*. *Infect. Immun.* 62:4261-4269.
5. Lopez, C. M., Rholl, D. A., Trunck, L. A., Schweizer, H. P. 2009. Versatile dual-technology system for markerless allele replacement in *Burkholderia pseudomallei*. *Appl Environ Microbiol.* 20:6496-503
6. Martinez de Tejada, G., J. F. Miller, and P. A. Cotter. 1996. Comparative analysis of the virulence control systems of *Bordetella pertussis* and *Bordetella bronchiseptica*. *Mol. Microbiol.* 22:895-908.
7. Cotter PA, Yuk MH, Mattoo S, Akerley BJ, Boschwitz J, et al. (1998) Filamentous hemagglutinin of *Bordetella bronchiseptica* is required for efficient establishment of tracheal colonization. *Infect Immun* 66: 5921-5929.
